## Impact of aortic valve replacement on outcomes of patients with low-flow, low-gradient moderate aortic stenosis

M.S. Annabi<sup>1</sup>, A. Dahou<sup>1</sup>, J. Bergler-Klein<sup>2</sup>, I.G. Burwash<sup>3</sup>, S. Orwat<sup>4</sup>, H. Baumgartner<sup>4</sup>, P.E. Bartko<sup>2</sup>, J. Mascherbauer<sup>2</sup>, G. Mundigler<sup>2</sup>, J. Cavalcante<sup>5</sup>, H.B. Ribeiro<sup>6</sup>, J. Rodes-Cabau<sup>1</sup>, M.A. Clavel<sup>1</sup>, P. Pibarot<sup>1</sup>

<sup>1</sup>Quebec Heart and Lung Institute, Quebec, Canada; <sup>2</sup>Medical University of Vienna, Department of Internal Medicine II, Division of Cardiology, Vienna, Austria; <sup>3</sup>University of Ottawa Heart Institute, Ottawa, Canada; <sup>4</sup>University Hospital of Munster, Muenster, Germany; <sup>5</sup>University of Pittsburgh, Division of Cardiology, Pittsburgh, United States of America; <sup>6</sup>Heart Institute of the University of Sao Paulo (InCor), Sao Paulo, Brazil  
On behalf of TOPAS study

**Funding Acknowledgement:** Canadian Institute of Health Research

**Background:** Aortic valve replacement (AVR) is recommended for patients with low-flow, low-gradient (LFLG) and true-severe aortic stenosis (TSAS). However, there is very few data on the potential benefit of AVR in patients with LFLG pseudo-severe (i.e. moderate) AS (PSAS).

**Methods:** Consecutive patients with aortic valve area  $\leq 0.6$  cm<sup>2</sup>/m<sup>2</sup>, mean gradient  $<40$  mmHg were prospectively recruited in a multicenter observational cohort study. The patients were categorized in TSAS vs. PSAS using previously reported thresholds of flow-independent parameters of AS severity (projected valve area at normal flow rate  $\leq 1.0$  cm<sup>2</sup> and/or aortic valve calcium score by CT  $>1200$  AU in women and  $>2000$  AU in men). To account for between-treatment-group differences, inverse probability-of-treatment weighting was combined to Cox proportional hazards regression.

**Results:** Among the 430 patients included in this study, 297 (69%) were

classified as TSAS and 274 (57%) underwent AVR. Of note, 21% of the patients treated by AVR were classified as PSAS. In patients managed conservatively (ConsRx), 52% had PSAS and 48% TSAS. During a median follow-up of 28 months [8–60], 198 patients died. The adjusted weighted hazard ratio (awHR) of death associated with AVR as compared to ConsRx was 0.42 [0.24–0.73] ( $p<0.0001$ , Figure1-Panel-A). This survival benefit associated with AVR was observed not only in patients with TSAS but also in those with PSAS (awHR: 0.29 [0.12–0.70];  $p=0.006$ , Figure1-Panel-B).

**Conclusion:** The results of this study suggest that AVR is associated with a survival benefit not only in LFLG patients with TSAS but also in those with PSAS. Randomized trials are needed to confirm the benefit of AVR in patients with moderate AS and depressed LV systolic function.

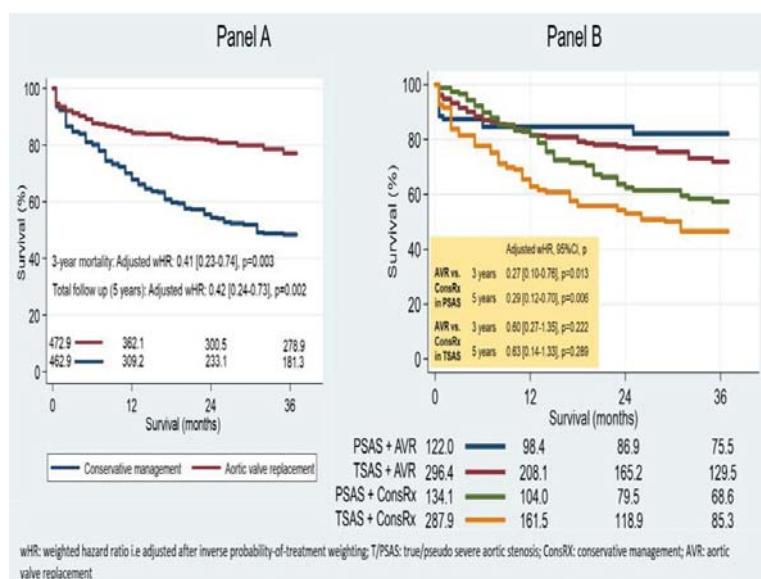

Figure 1
